# Supplementary material for: Gene expression in response to optical defocus of opposite signs reveals bidirectional mechanism of visually guided eye growth
Source: PLoS Biol. 2018 Oct 9;16(10):e2006021. doi: 10.1371/journal.pbio.2006021 (PMC6177118; doi:10.1371/journal.pbio.2006021)
Supplement: S20 Table — (XLSX) [file pbio.2006021.s020.xlsx]

## Sheet: Overlap -5D 5 weeks _ +5D 5 wee
S20 Table. Genes differentially expressed in the retina of common marmosets both after exposure to -5D and +5D lenses for 5 weeks
Gene ID	-5D RvsL 5 weeks		+5D RvsL 5 weeks
	mean	SD	mean	SD
ACTR8	-1.11	0.0818535	1.16667	0.0929157
ANAPC16	1.12667	0.0750555	1.15333	0.0450925
COMMD3	-1.09667	0.064291	1.09667	0.0321455
CUL3	-1.07667	0.0416333	1.06333	0.046188
LOC100385257	1.15667	0.0404145	1.29	0.147986
LOC100392587	-1.14	0.08544	1.39333	0.130512
LOC100394543	-1.08667	0.0404145	1.07333	0.0288675
LOC100394842	-1.12	0.0360555	1.20667	0.150111
LOC100396694	-1.21	0.167033	1.17333	0.0602771
LOC103794697	1.31	0.155242	-1.26667	0.166533
MTCH2	1.02333	0.0152753	1.14	0.0360555
NOTCH2	1.2	0.072111	1.13333	0.0602771
PPP2CA	-1.07667	0.011547	1.1	0.0655744
RCBTB1	-1.05667	0.023094	1.08	0.02
STARD3NL	-1.16667	0.064291	1.1	0.052915
TRIM23	-1.02667	0.0057735	1.12667	0.0737111
ULK1	-1.15333	0.0321455	-1.32667	0.159478
ZC3H11A	-1.04333	0.0152753	1.1	0.0264575
